# Supplementary material
Source: PubMed Central journal article supplement (PMC4013508)
Supplement: NIHMS58230-supplement-Supplementary_Text_and_Figures.pdf [file NIHMS58230-supplement-Supplementary_Text_and_Figures.pdf]

## **Retinoid X receptor gamma signaling accelerates CNS remyelination**

Jeffrey K. Huang, Andrew A. Jarjour, Brahim Nait Oumesmar, Christophe Kerninon, Anna Williams, Wojciech Krezel, Hiroyuki Kagechika, Julien Bauer, Chao Zhao, Anne Baron-Van Evercooren, Pierre Chambon, Charles ffrench-Constant, Robin J. M. Franklin

### **SUPPLEMENTARY MATERIAL**

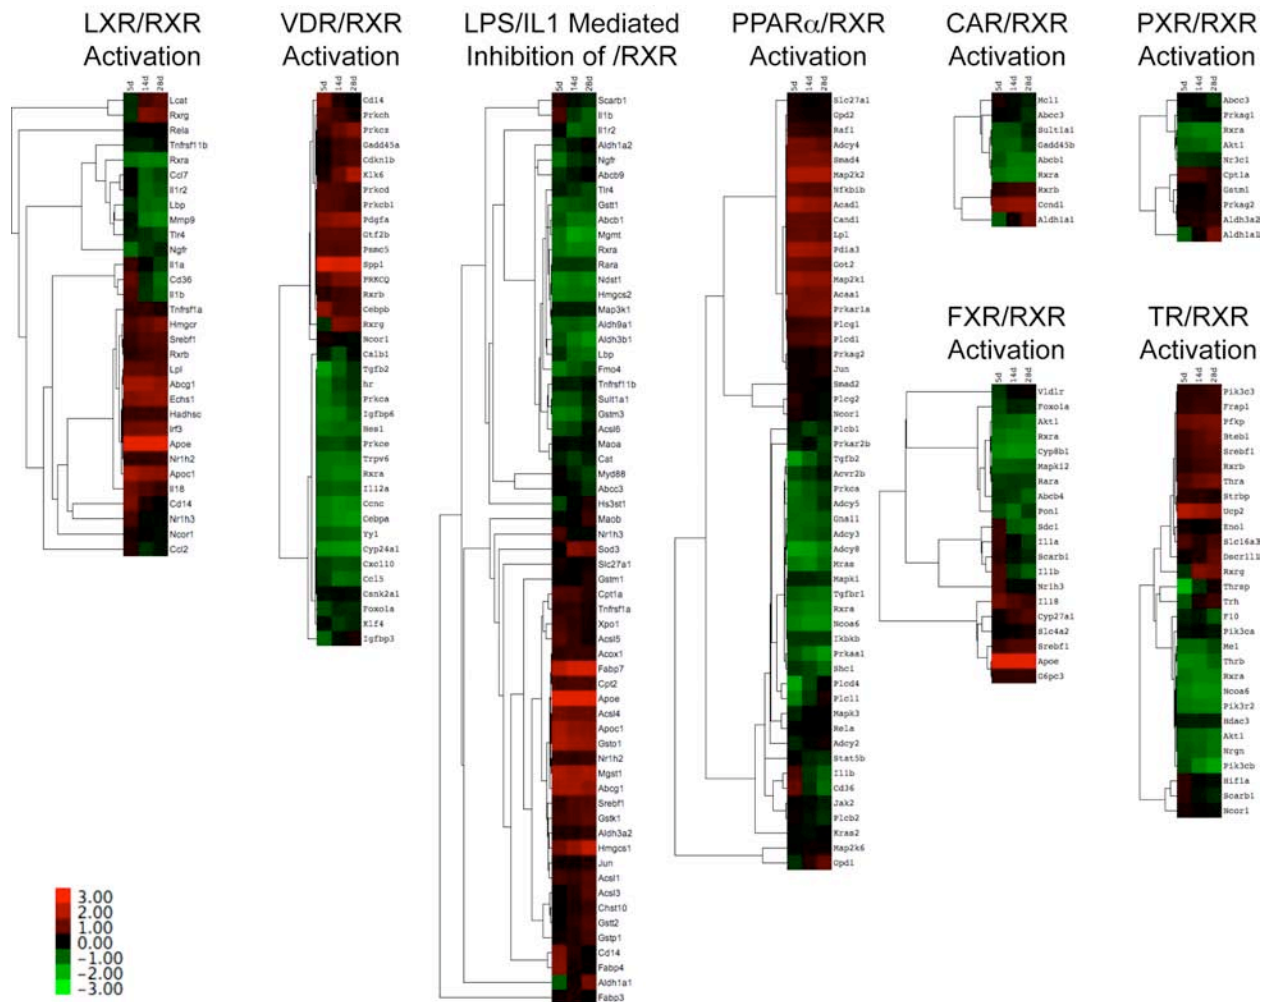

**Supplementary Figure 1.** Graphical analysis of IPA identified genes associated with RXR signaling. Total differentially expressed genes from 3 postlesion time points were analyzed and those associated with each RXR activation pathways were clustered by hierarchical clustering and visualized by Java TreeView.

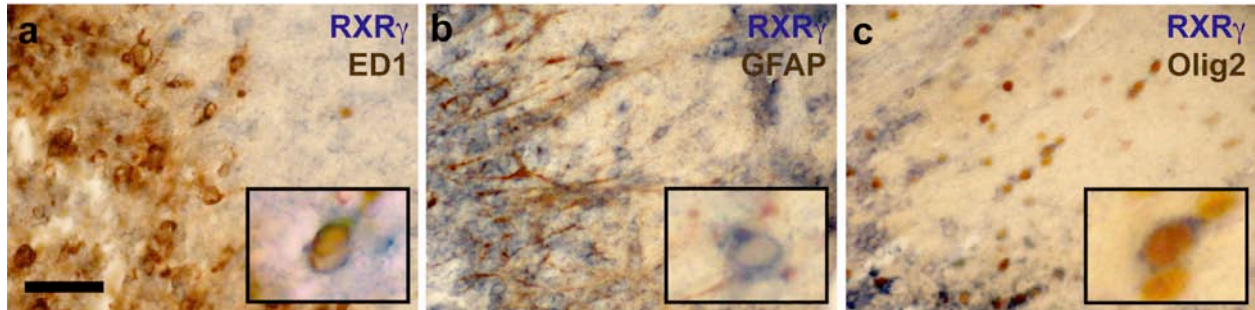

**Supplementary Figure 2.** *Rxrg* expression in remyelinating lesions. *In situ* hybridization against *Rxrg* followed by immunoperoxidase staining on 14 dpl CCPs with (a) ED1, (b) GFAP, and (c) OLIG2 was performed. *Rxrg* was detected in ED1<sup>+</sup> macrophage, GFAP<sup>+</sup> astrocytes, and Olig2<sup>+</sup> oligodendrocyte lineage cells. Insets are enlarged images of cells expressing *Rxrg*. Scale bar = 50  $\mu$ m.

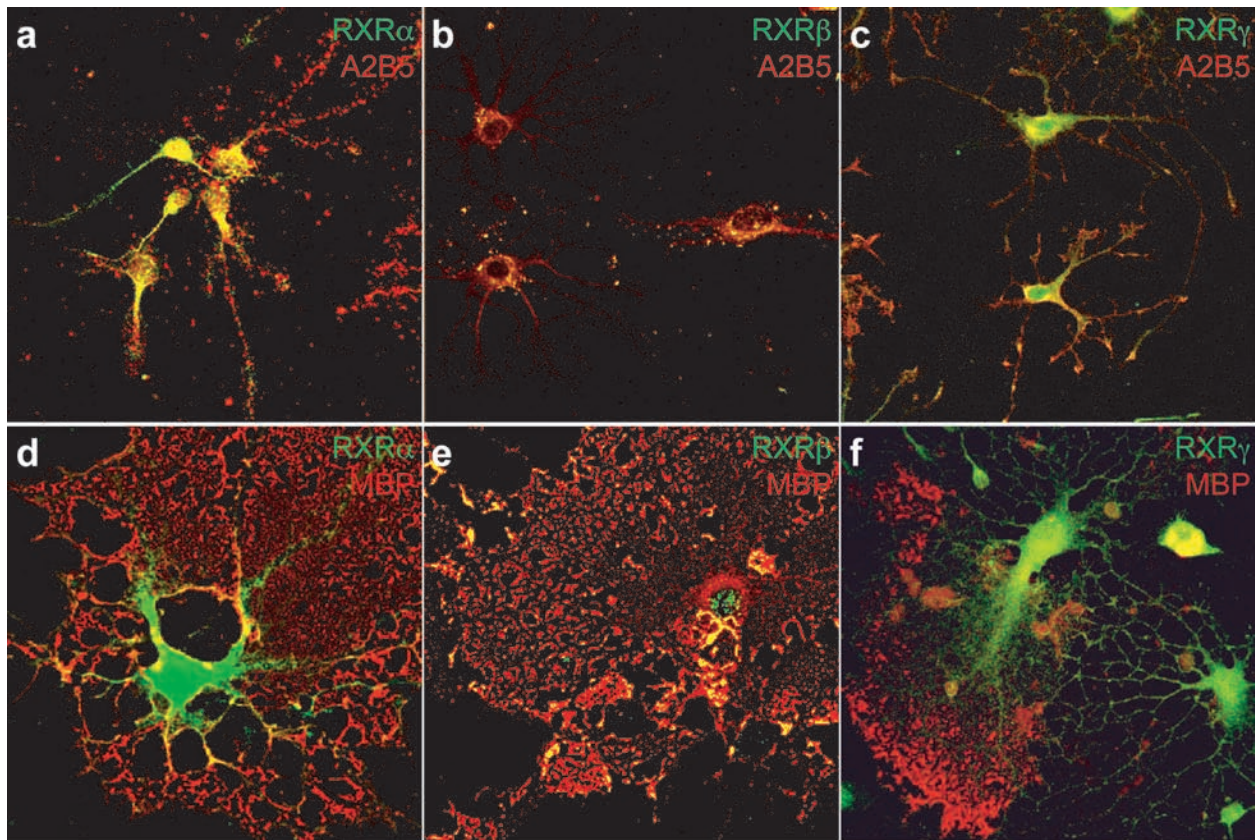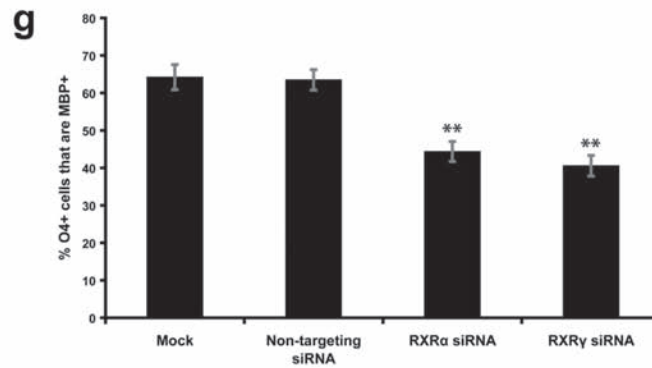

**Supplementary Figure 3.** Decreased oligodendrocyte differentiation after RXR- $\gamma$  knockdown. Immunostaining of (a, d) RXR- $\alpha$ , (b, e) RXR- $\beta$ , and (c, f) RXR- $\gamma$  co-labeled with anti-O4 at 1 day and anti-MBP at 3 days *in vitro* show high RXR- $\alpha$  and RXR- $\gamma$  expression, and relatively low RXR- $\beta$  expression in oligodendrocyte lineage cells. (g) Percentage of O4<sup>+</sup> MBP<sup>+</sup> cells following transfection with siRNAs against RXR- $\alpha$  or RXR- $\gamma$ . Mean values  $\pm$  s.e.m. are displayed. \*\*P < 0.005 vs. control, Student's t-test.

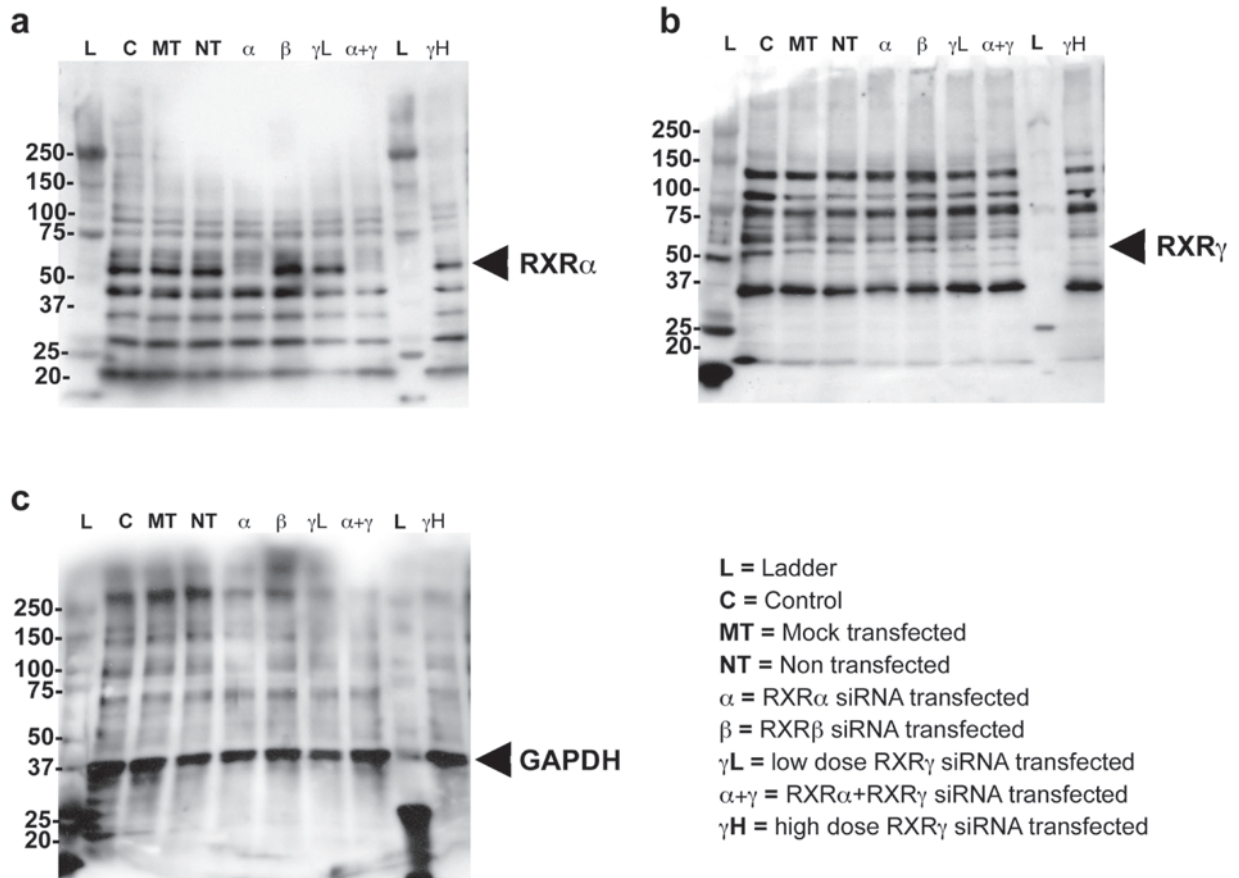

**Supplementary Figure 4.** Full length blot showing siRNA knockdown of RXR- $\alpha$  and RXR- $\gamma$ . OPC lysates labeled with antibodies against (a) RXR- $\alpha$ , (b) RXR- $\gamma$ , and (c) GAPDH.

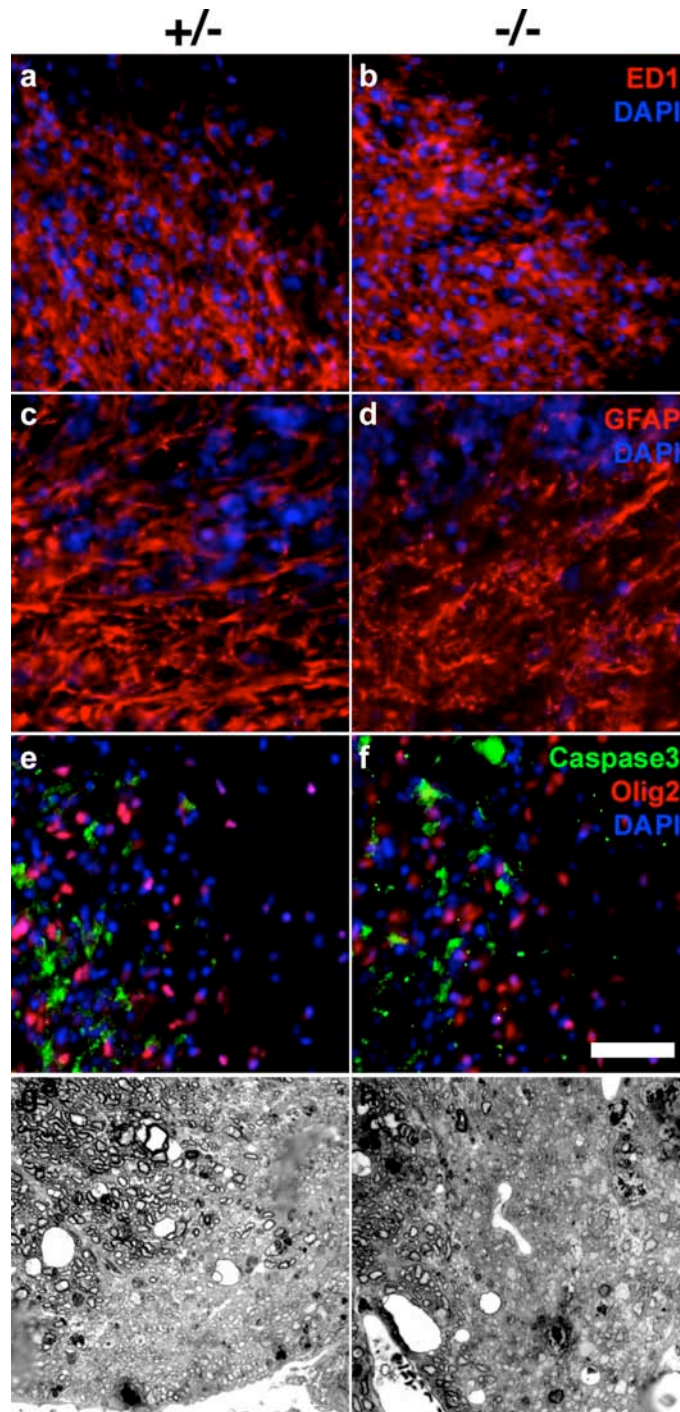

**Supplementary Figure 5.** *Rxrg*<sup>+/-</sup> and <sup>-/-</sup> mouse analysis. Immunostaining for (a, b) ED1, (c, d) GFAP reveal no obvious difference in macrophage or astrocyte recruitment to lesions between +/- and -/- animals at 15 dpl. Immunostaining for (e, f) Caspase 3 and Olig2 reveals no obvious difference in oligodendrocyte lineage cells under going apoptosis in lesion at 15 dpl. Scale bar = 50  $\mu$ m. (g, h) Semi-thin resin sections of mouse spinal cords at 30 dpl reveal no obvious difference in the extent of remyelination.

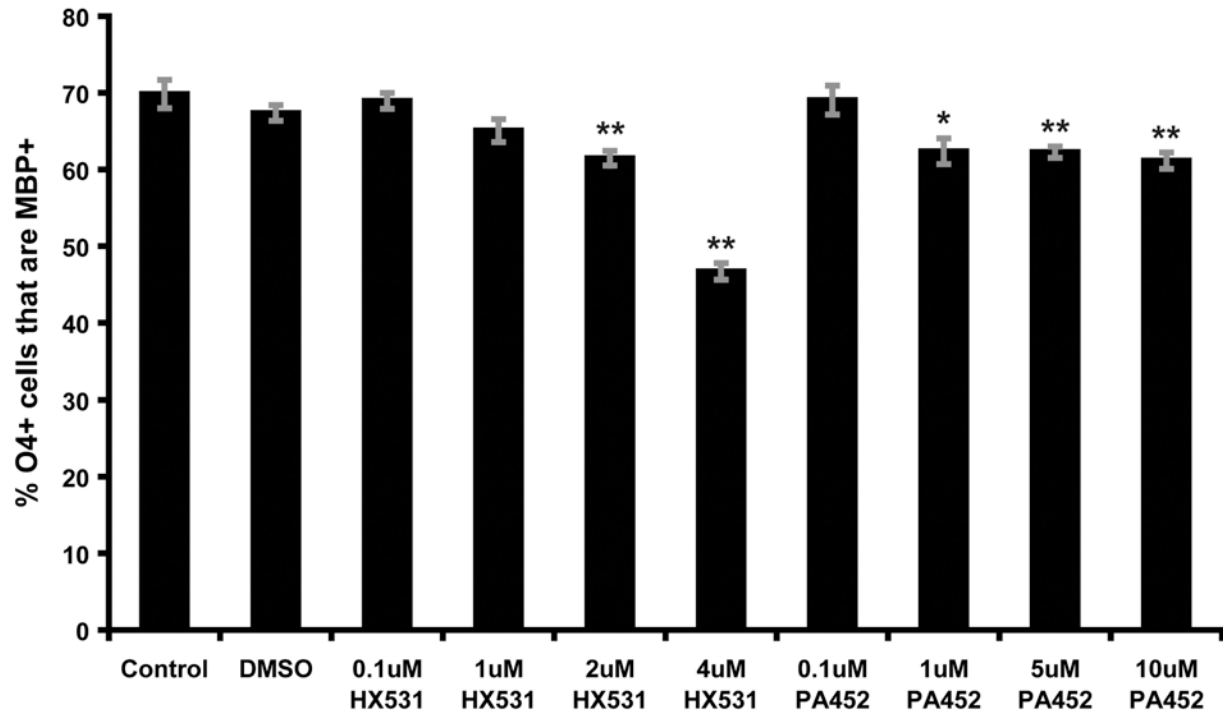

**Supplementary Figure 6.** Decreased oligodendrocyte differentiation after RXR antagonist treatment. Percentage of O4<sup>+</sup> cells that are also MBP<sup>+</sup> were analyzed following treatment with increasing concentrations of either HX531 or PA452. Mean values  $\pm$  s.e.m. are displayed. \*P < 0.05 vs. control, \*\*P < 0.005 vs. control, Student's t-test.

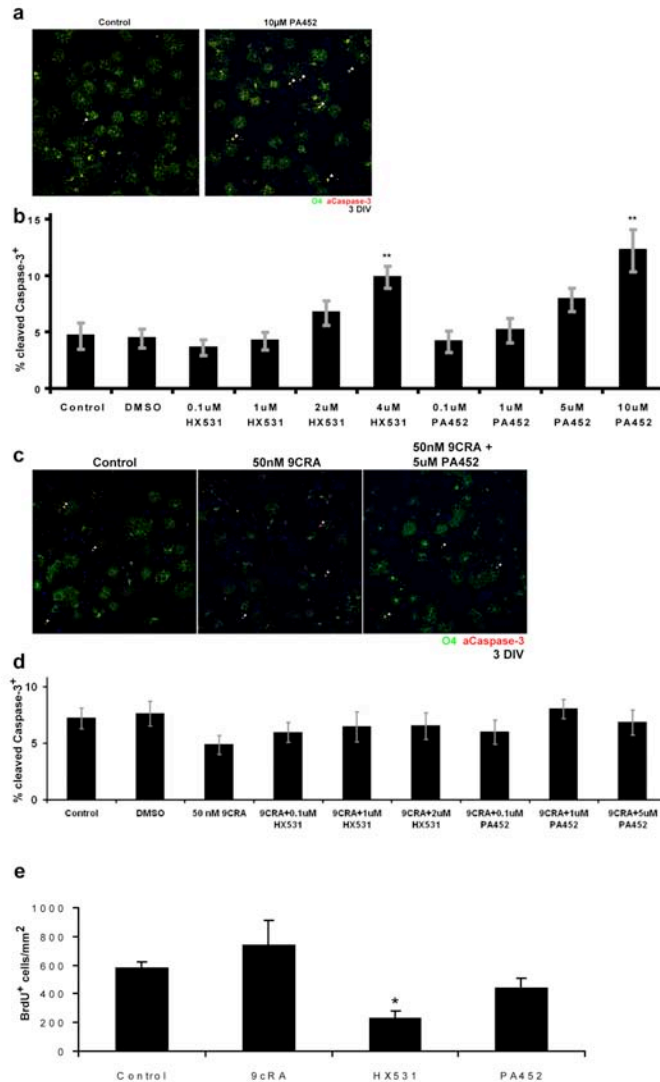

**Supplementary Figure 7.** Apoptosis and proliferation count. Extent of cell death using anti-caspase 3 was determined in culture oligodendrocytes without treatment or with treatment with antagonists at 3 days *in vitro*. **(a)** At 10 µm PA452, there was a significant increase of oligodendrocytes under going apoptosis compared to control. **(b)** An analysis of the percentage of caspase3<sup>+</sup> cells at different antagonist concentrations shows that neither HX531 nor PA452 influenced cell survival at the concentrations used for oligodendrocyte differentiation analysis. Cell death count only significantly increased at 4 µm HX531 and 10 µm PA452. **(c, d)** Analysis of caspase3 activity in 9cRA treated cultures revealed that 50 nM 9cRA or 50 nM 9cRA + up to 5 µm PA452 did not influence oligodendrocyte survival. **(e)** BrdU labeling for 16 hours at day 2 after demyelination and 9cRA or antagonist (2 µm HX531 or 5 µm PA452) treatment in *ex vivo* cerebellar slice cultures. There was a significant decrease in cell proliferation in HX531 treated cultures, but no significant difference between control and 9cRA or control and PA452 treated cultures. N = 2, 5 slices per factor. Mean values ± s.e.m. are displayed. \*P < 0.05, \*\*P < 0.01, Student's t-test.



## **SUPPLEMENTARY TABLE LEGENDS**

**Supplementary Table 1.** Total genes differentially expressed between 5, 14 and 28 days post CCP demyelination.

**Supplementary Table 2.** Gene list used for IPA analysis.

**Supplementary Table 3.** Active signaling networks found between 5 and 14 dpl.

**Supplementary Table 4.** Total genes differentially expressed between 5 and 14 dpl ( $P < 0.05$ ) used for volcano plot.

**Supplementary Table 5.** Assessment of known nuclear receptors in the CNS remyelination transcriptome.

**Supplementary Table 6.** IPA identified RXR associated pathways from the remyelination transcriptome.

**Supplementary Table 7.** Clinical data of the MS cases and classification of the lesions.

| <b>SYMBOL</b> | <b>Differentially expressed (P&lt;0.05)</b> | <b>Nonpermissive heterodimer</b> | <b>Adj P-Val</b> | <b>SYNONYM</b> |
|---------------|---------------------------------------------|----------------------------------|------------------|----------------|
| Cxr           |                                             |                                  |                  |                |
| Nr1h2         |                                             |                                  | 0.438719873      | LXRbeta        |
| Nr1h3         | ✓                                           |                                  | 0.006468102      | LXRalpha       |
| Nr1h4         |                                             |                                  |                  | Fxr            |
| Nr2f1         | ✓                                           |                                  | 0.003907145      | Tfcoup1        |
| Nr2f2         |                                             |                                  | 0.426103081      | Tfcoup2        |
| Nr2f6         |                                             |                                  | 0.08818271       | Ear2           |
| Nr4a2         | ✓                                           |                                  | 0.002880986      | Nurr1          |
| Ppara         |                                             |                                  |                  |                |
| Ppard         |                                             |                                  |                  |                |
| Pparg         |                                             |                                  |                  |                |
| Pxr           |                                             |                                  |                  |                |
| Rara          |                                             | ✓                                | 0.859072094      |                |
| Rara          |                                             |                                  |                  |                |
| Rarb          |                                             | ✓                                | 0.61727044       |                |
| Rarb          |                                             |                                  |                  |                |
| Rarg          |                                             | ✓                                |                  |                |
| Rxra          | ✓                                           |                                  | 0.039560609      |                |
| Rxrb          | ✓                                           |                                  | 0.006203785      |                |
| Rxrg          | ✓                                           |                                  | 0.002255554      |                |
| Thra          | ✓                                           | ✓                                | 0.021245057      |                |
| Thrb          | ✓                                           | ✓                                | 0.015554236      |                |
| Vdr           |                                             | ✓                                |                  |                |

**Supplementary Table 5.** Assessment of known nuclear receptors in the CNS remyelination transcriptome.

| Cases    | Sex | Age (years) | PMD (h) | Course | Active | Chronic silent | Shadow plaque | PPWM | Topography                                          |
|----------|-----|-------------|---------|--------|--------|----------------|---------------|------|-----------------------------------------------------|
| MS3132   | F   | 65          | 20      | SP     |        | 1              | 1             | 1    | White matter, temporal lobe                         |
| MS3603   | M   | 60          | 22      | RR     | 1      | 1              |               | 1    | Subcortical white matter, occipital lobe (internal) |
| MS7914   | F   | 74          | 45      | SP     | 2      | 3              |               | 3    | Periventricular area, left frontoparietal region    |
| Controls |     |             |         |        |        |                |               |      |                                                     |
| 3861     | F   | 74          | 49      |        |        |                |               |      |                                                     |
| 4984     | M   | 70          | 30      |        |        |                |               |      |                                                     |
| 2468     | F   | 66          | 43      |        |        |                |               |      |                                                     |

*PMD, postmortem delay; PP, primary progressive; SP, secondary progressive; RP, relapsing progressive; ND, not determined.*

**Supplementary Table 7.** Clinical data of the MS cases and classification of the lesions.
